# Supplementary material for: Intraspinal injection of adeno-associated viruses into the adult mouse spinal cord
Source: PubMed Central journal article supplement — STAR Protoc. 2021 Sep 1;2(3):100786. doi: 10.1016/j.xpro.2021.100786 (PMC8414904; doi:10.1016/j.xpro.2021.100786), 2021-09-01
Supplement: mmc1.pdf [file mmc1.pdf]

**Supplemental Table S1: Recipe for drug cocktails, related to step 19 in part C and step 27 in part 4**

|                       | Stock concentration | Drug dosage | volume (µl)                  |       |        |      |        |       |        |      |        |       |
|-----------------------|---------------------|-------------|------------------------------|-------|--------|------|--------|-------|--------|------|--------|-------|
| ANESTHESIA 1 COCKTAIL |                     |             | Total number of mice (~25 g) |       |        |      |        |       |        |      |        |       |
|                       |                     |             | 1                            | 2     | 3      | 4    | 5      | 6     | 7      | 8    | 9      | 10    |
| Fentanyl              | 50 µg/ml            | 0.05 mg/kg  | 25                           | 50    | 75     | 100  | 125    | 150   | 175    | 200  | 225    | 250   |
| Dexmedetomidin        | 0.5 mg/ml           | 1 mg/kg     | 50                           | 100   | 150    | 200  | 250    | 300   | 350    | 400  | 450    | 500   |
| Midazolam             | 1 mg/ml             | 5 mg/kg     | 125                          | 250   | 375    | 500  | 625    | 750   | 875    | 1000 | 1125   | 1250  |
| Saline                |                     |             | 200                          | 400   | 600    | 800  | 1000   | 1200  | 1400   | 1600 | 1800   | 2000  |
| Total                 |                     |             | 400                          | 800   | 1200   | 1600 | 2000   | 2400  | 2800   | 3200 | 3600   | 4000  |
| REVERSAL 1 COCKTAIL   |                     |             | Total number of mice (~25 g) |       |        |      |        |       |        |      |        |       |
|                       |                     |             | 1                            | 2     | 3      | 4    | 5      | 6     | 7      | 8    | 9      | 10    |
| Atipemazole           | 5 mg/ml             | 2.5 mg/kg   | 12.5                         | 25    | 37.5   | 50   | 62.5   | 75    | 87.5   | 100  | 112.5  | 125   |
| Buprenorphine         | 0.3 mg/ml           | 0.1 mg/kg   | 8.25                         | 16.5  | 24.75  | 33   | 41.25  | 49.5  | 57.75  | 66   | 74.25  | 82.5  |
| Flumazenil            | 0.1 mg/ml           | 0.2 mg/kg   | 50                           | 100   | 150    | 200  | 250    | 300   | 350    | 400  | 450    | 500   |
| Saline                |                     |             | 79.25                        | 158.5 | 237.75 | 317  | 396.25 | 475.5 | 554.75 | 634  | 713.25 | 792.5 |
| Total                 |                     |             | 150                          | 300   | 450    | 600  | 750    | 900   | 1050   | 1200 | 1350   | 1500  |
| ANESTHESIA 2 COCKTAIL |                     |             | Total number of mice (~25 g) |       |        |      |        |       |        |      |        |       |
|                       |                     |             | 1                            | 2     | 3      | 4    | 5      | 6     | 7      | 8    | 9      | 10    |
| Ketamine              | 50 mg/ml            | 100 mg/kg   | 50                           | 100   | 150    | 200  | 250    | 300   | 350    | 400  | 450    | 500   |
| Xylazine              | 1 mg/ml             | 10 mg/kg    | 250                          | 250   | 250    | 250  | 250    | 250   | 250    | 250  | 250    | 2500  |
| Saline                |                     |             | 300                          | 350   | 400    | 450  | 500    | 550   | 600    | 650  | 700    | 3000  |
| Total                 |                     |             | 600                          | 700   | 800    | 900  | 1000   | 1100  | 1200   | 1300 | 1400   | 6000  |
| REVERSAL 2 COCKTAIL   |                     |             | Total number of mice (~25 g) |       |        |      |        |       |        |      |        |       |
|                       |                     |             | 1                            | 2     | 3      | 4    | 5      | 6     | 7      | 8    | 9      | 10    |
| Atipemazole           | 5 mg/ml             | 2.5 mg/kg   | 12.5                         | 25    | 37.5   | 50   | 62.5   | 75    | 87.5   | 100  | 112.5  | 125   |
| Buprenorphine         | 0.3 mg/ml           | 0.1 mg/kg   | 8.25                         | 16.5  | 24.75  | 33   | 41.25  | 49.5  | 57.75  | 66   | 74.25  | 82.5  |
| Saline                |                     |             | 20.75                        | 41.5  | 62.25  | 83   | 103.75 | 124.5 | 145.25 | 166  | 186.75 | 207.5 |
| Total                 |                     |             | 41.5                         | 83    | 124.5  | 166  | 207.5  | 249   | 290.5  | 332  | 373.5  | 415   |
| ANALGESIC             |                     |             | Total number of mice (~25 g) |       |        |      |        |       |        |      |        |       |
|                       |                     |             | 1                            | 2     | 3      | 4    | 5      | 6     | 7      | 8    | 9      | 10    |
| Meloxicam             | 5 mg/ml             | 2 mg/kg     | 10                           | 20    | 30     | 40   | 50     | 60    | 70     | 80   | 90     | 100   |
| Saline                |                     |             | 290                          | 580   | 870    | 1160 | 1450   | 1740  | 2030   | 2320 | 2610   | 2900  |
| Total                 |                     |             | 300                          | 600   | 900    | 1200 | 1500   | 1800  | 2100   | 2400 | 2700   | 3000  |
